# Supplementary figures and images for: TGFβ promotes low IL10-producing ILC2 with profibrotic ability involved in skin fibrosis in systemic sclerosis
Source: HighWire-hosted journal article supplement (doi:10.1136/annrheumdis-2020-219748), 2021-07-20

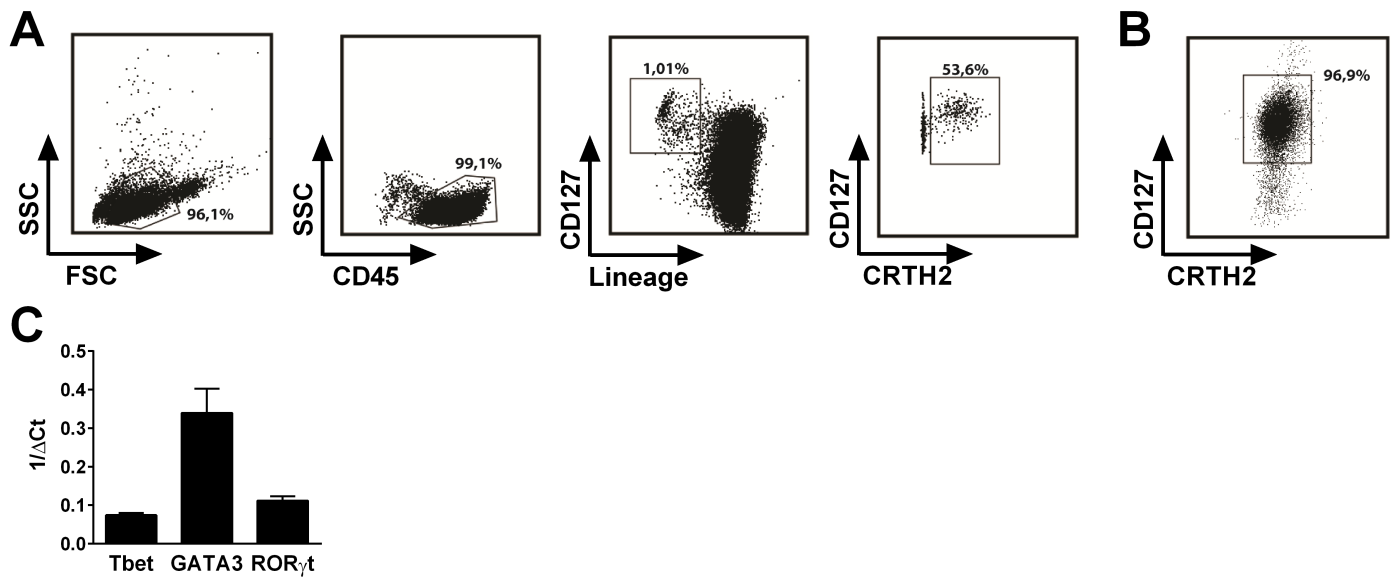

Supplement: annrheumdis-2020-219748supp005_data_supplement.pdf [file annrheumdis-2020-219748supp005_data_supplement.pdf]

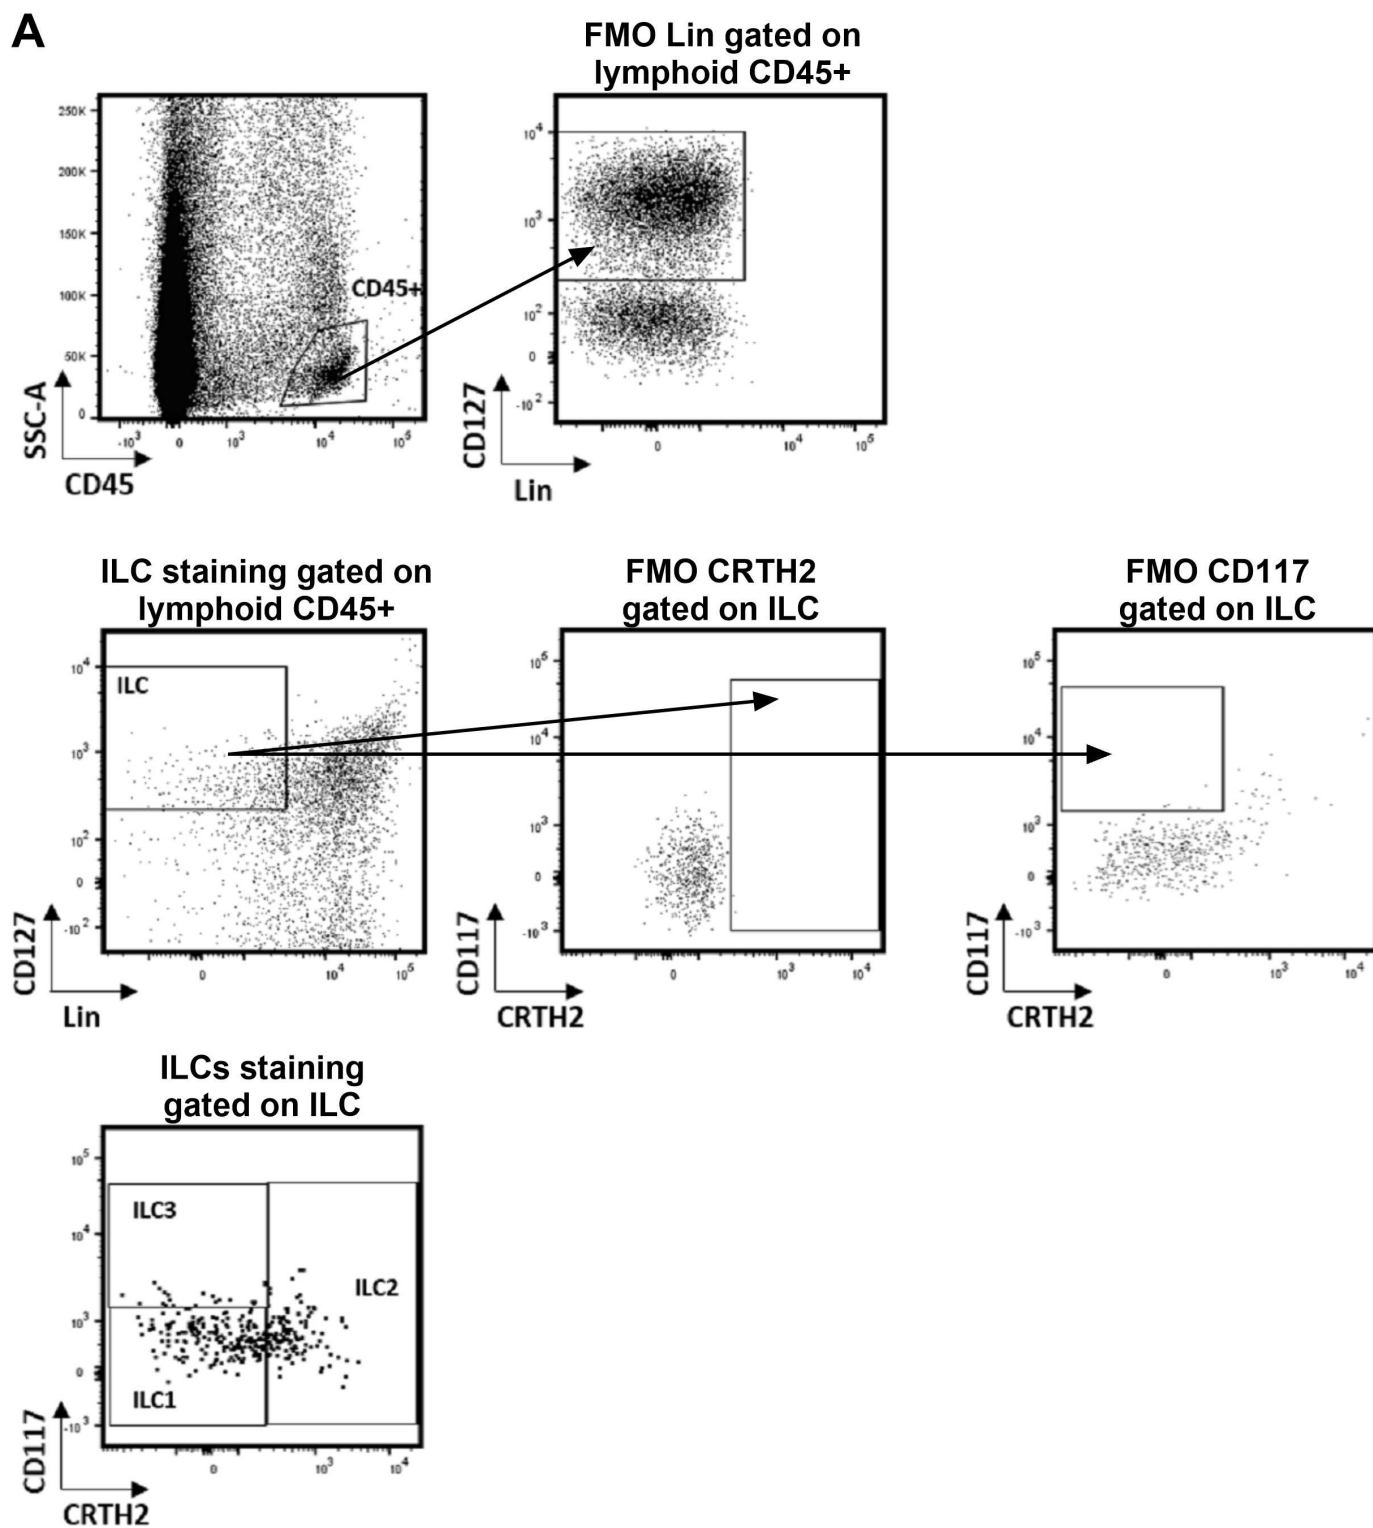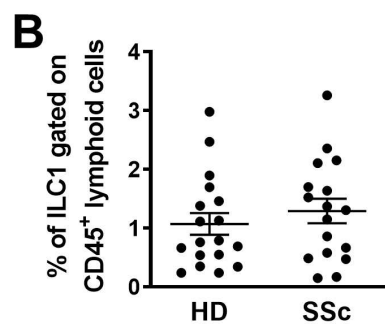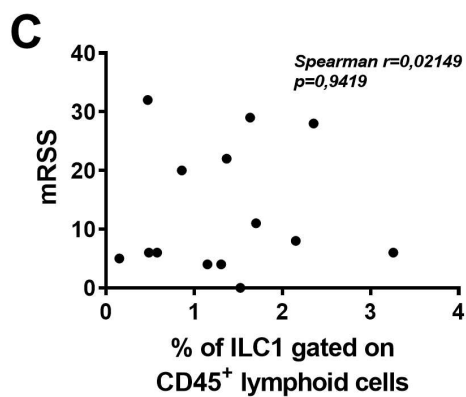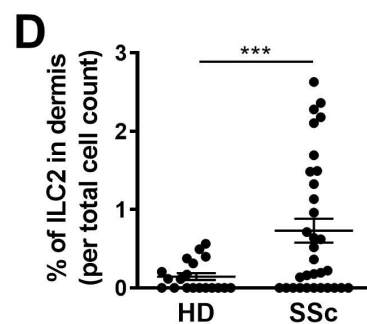

Supplement: annrheumdis-2020-219748supp004_data_supplement.pdf [file annrheumdis-2020-219748supp004_data_supplement.pdf]
